# Supplementary material
Source: Springer Nature journal article supplement (https://www.springermedizin.de/resource/supplementary/13058_2013_3420_MOESM11_ESM.pdf/9704130)

**A**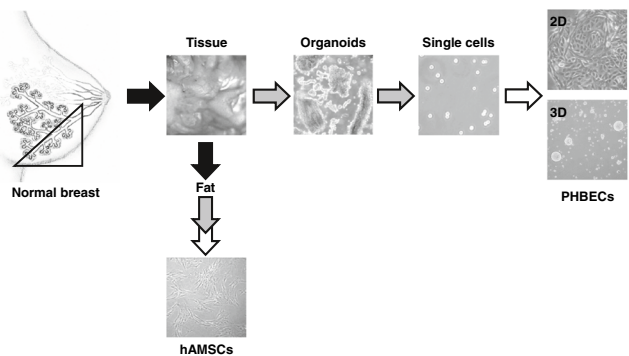**B**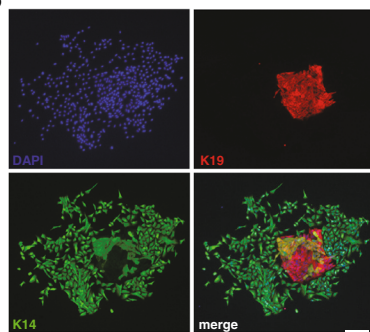**C**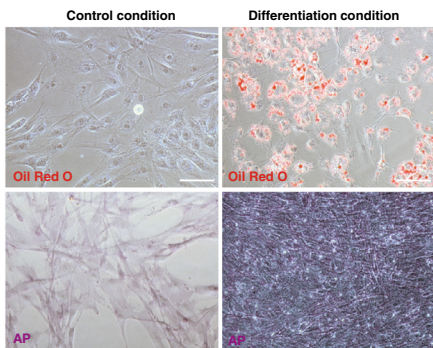**D**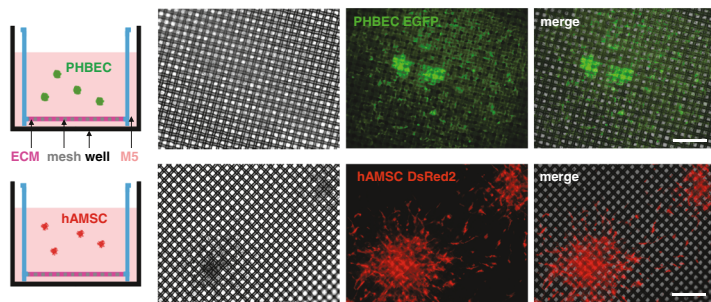**E**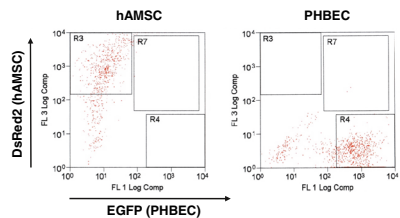**F**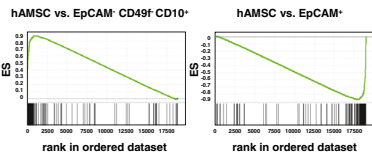**G**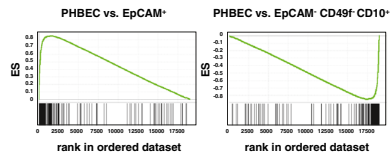

Supplement: MOESM11 [file 9704130]
